# Supplementary material for: Using a low temperature crystallization process to prepare anatase TiO2 buffer layers for air-stable inverted polymer solar cells
Source: Royal Society of Chemistry journal article supplement (doi:10.1039/b922373h), 2010-01-01
Supplement: b922373h.pdf [file b922373h.pdf]

## Supporting information

### Using a low temperature crystallization process to prepare anatase TiO<sub>2</sub> buffer layers for air-stable inverted polymer solar cells

Jen-Hsien Huang,<sup>1</sup> Hung-Yu Wei,<sup>2</sup> Kuan-Chieh Huang,<sup>3</sup> Cheng-Lun Chen,<sup>3</sup> Rui-Ren Wang,<sup>4</sup> Fang-Chung Chen,<sup>5</sup> Kuo-Chuan Ho,<sup>2,3,a)</sup> and Chih-Wei Chu<sup>1,5,b)</sup>

<sup>1</sup> Research Center for Applied Sciences, Academia Sinica, Taipei, Taiwan 11529

<sup>2</sup> Institute of Polymer Science and Engineering, National Taiwan University, Taipei, Taiwan 106

<sup>3</sup> Department of Chemical Engineering, National Taiwan University, Taipei, Taiwan 106

<sup>4</sup> Energy Textiles Section Department of Products, Taiwan Textile Research Institute, Taipei, Taiwan 236

<sup>5</sup> Department of Photonics National Chiao Tung University, Hsinchu, Taiwan 300

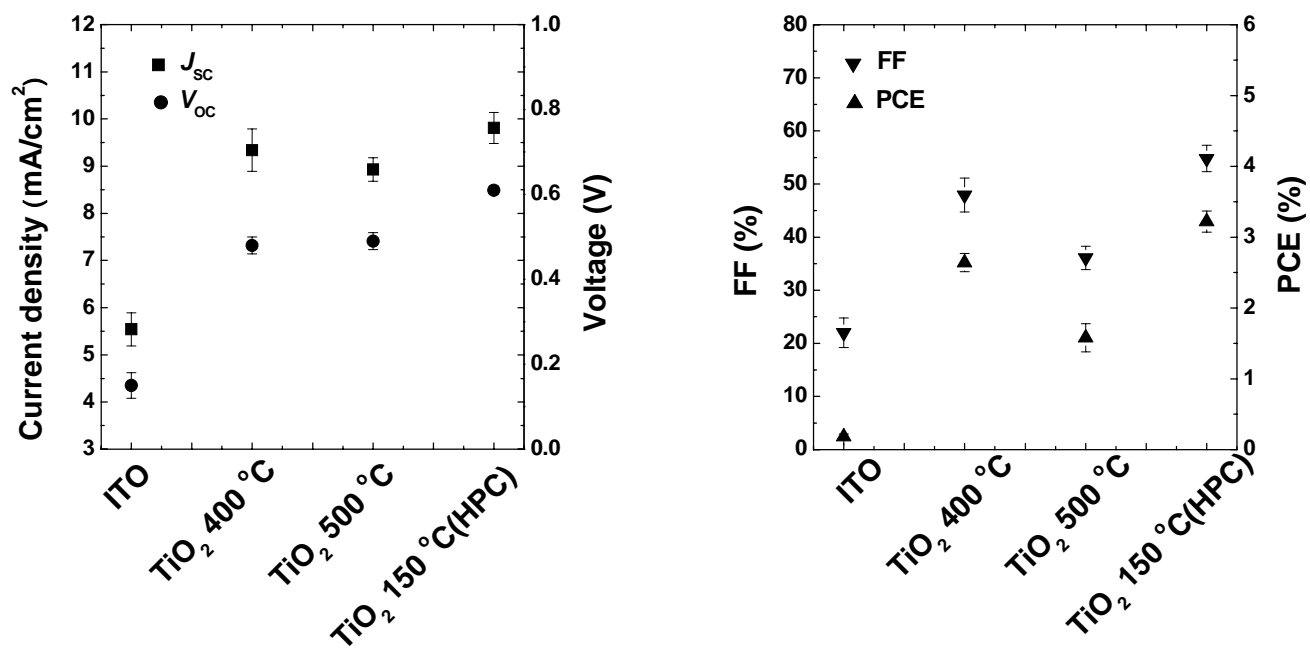

Figure S1. The performance of the BHJ devices with TiO<sub>2</sub> annealed at different temperatures.

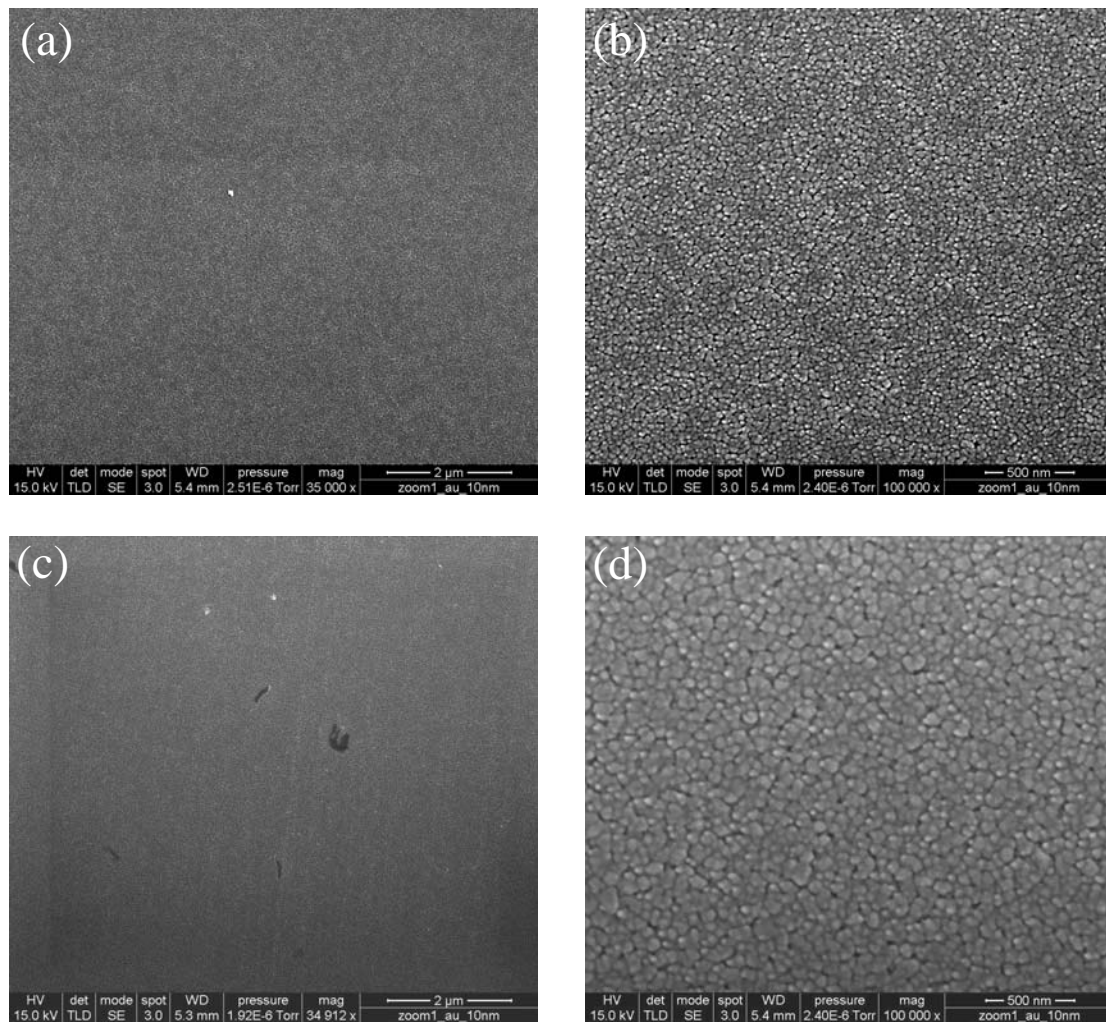

Figure S2 (a, b) the SEM images for the TiO<sub>2</sub> film annealed at 150 °C (HPC). (c, d) the SEM images for the TiO<sub>2</sub> film annealed at 500 °C.

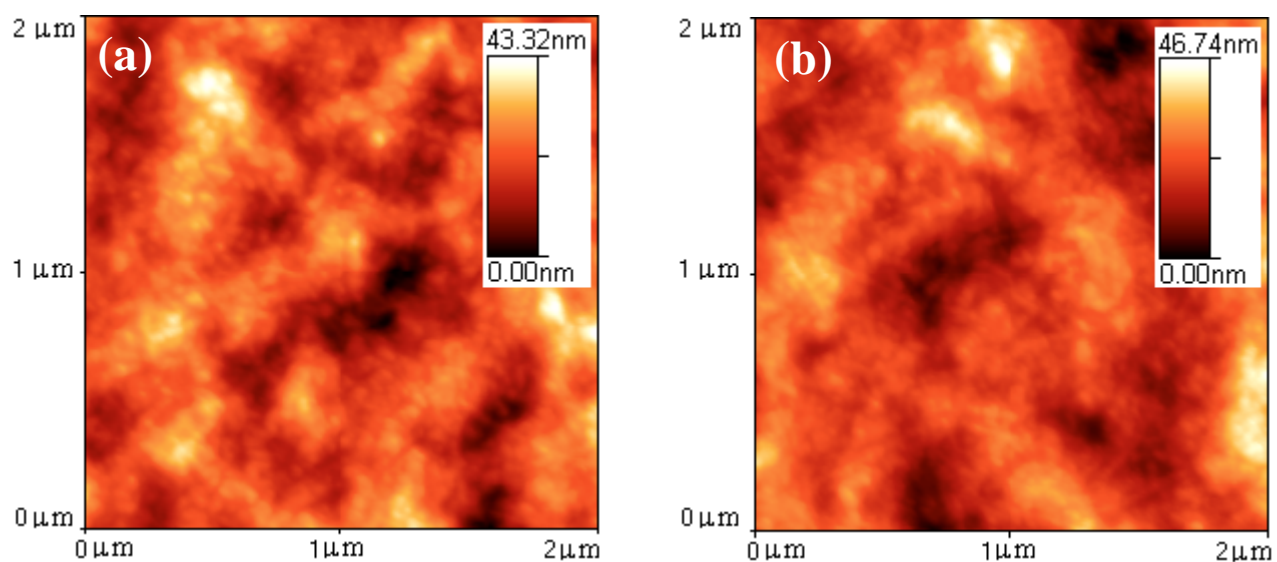

Figure S3 The AFM images of the BHJ devices fabricated with TiO<sub>2</sub> annealed at (a) 500 °C and (b) 150 °C (HPC).
